# Supplementary material for: Use of nicorandil is associated with increased risk of incident atrial fibrillation
Source: Aging (Albany NY). 2022 Sep 9;14(17):6975–92. doi: 10.18632/aging.204259 (PMC9512508; doi:10.18632/aging.204259)
Supplement: Supplementary Figures [file aging-14-204259-s002.pdf]

## SUPPLEMENTARY FIGURES

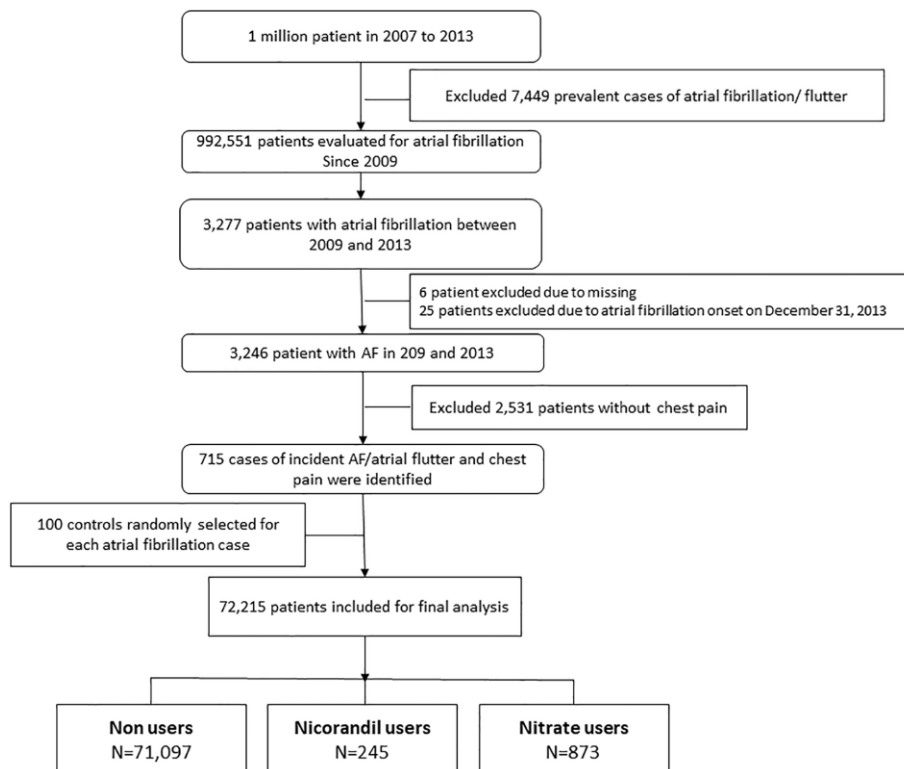

Supplementary Figure 1. The flowchart of the study design with patient inclusion and exclusion process.

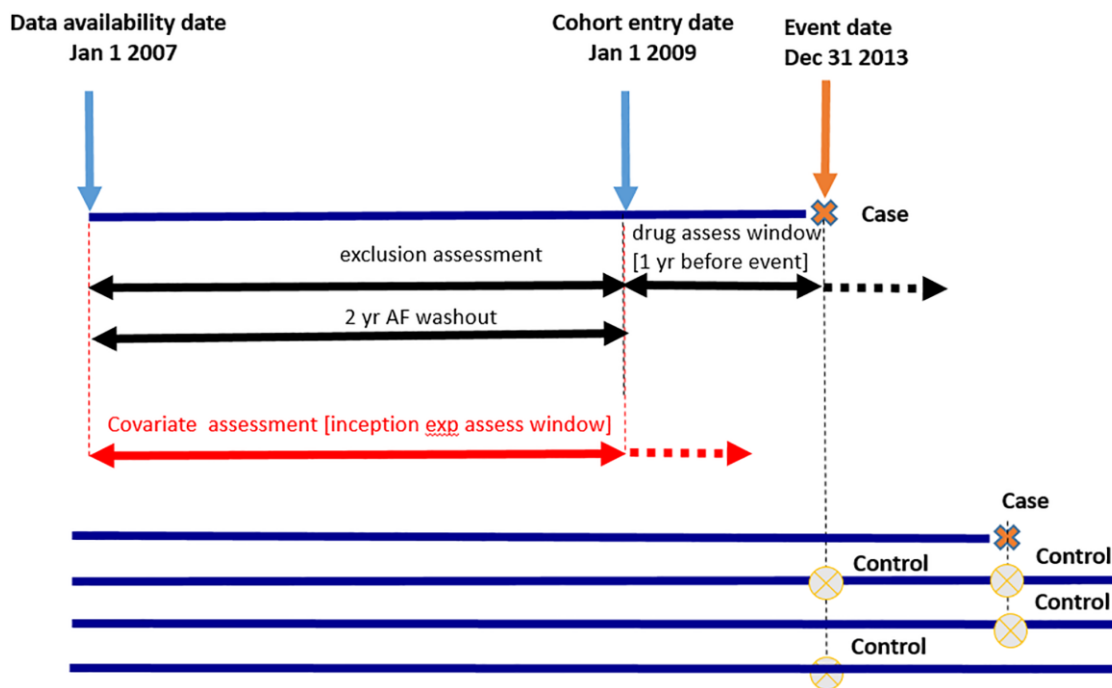

Supplementary Figure 2. The timeline figure indicates the specific periods used for exclusion of prevalent users, washout cases, identification of cases of controls, assessment of drug exposure and covariates.
